# Supplementary material
Source: PubMed Central journal article supplement (PMC4464667)
Supplement: NIHMS676486-supplement-Suppl.pdf [file NIHMS676486-supplement-Suppl.pdf]

**The list of differentially expressed genes identified in factorial analysis from Figure 1A.**

**Interaction**

|               |               |                    |               |
|---------------|---------------|--------------------|---------------|
| 1110001A07Rik | 1190002H23Rik | 1700065013Rik      | 2410002O22Rik |
| 2610030H06Rik | 2810407C02Rik | 6430706D22Rik      | Acaa2         |
| Actg2         | Ahr           | Apls2              | Ap3m1         |
| Apobec2       | Ar            | Arrdc4             | Atrx          |
| B430201A12Rik | B4galnt4      | Baiap3             | BC023892      |
| Bpnt1         | Clqa          | Clqb               | Calm1         |
| Camsap111     | Car2          | Ccdc132            | Ccdc28b       |
| Ccng2         | Ccr2          | Cd160              | Cd79b         |
| Cd83          | Cdr2          | Cebpa              | Cep170        |
| Clybl         | Csflr         | Ctnnb1             | Cul3          |
| Cxcl10        | Cxcr3         | D16Ertd472e        | Dcun1d1       |
| Ehhadh        | Eif5b         | ENSMUSG00000068790 |               |
| Ergic2        | Fbxl3         | Fcmd               | Fgf13         |
| Frmd4b        | Gadd45b       | Gata1              | Gna13         |
| Gpd2          | Hmgcs1        | Hook1              | Hsd17b12      |
| Icos          | Ifitm3        | I11rl1             | Immt          |
| Klrg1         | Lag3          | Ldlr               | Lyzs          |
| Maf           | Mak10         | Matk               | Matn2         |
| Memol         | Mmp14         | Ms4a4b             | NA            |
| Obfc2a        | Pde7a         | Pfas               | Plcb4         |
| Plxdc1        | Ppm2c         | Psme4              | Ptk2          |
| Ptpn13        | Rab18         | Rdh11              | Rg9mtd2       |
| Rnf11         | Rps4y2        | Rrm2b              | S100a4        |
| Saa3          | Sacs          | Senp2              | Serinc1       |
| Serpinb6b     | Sgk           | Slc35a1            | Slu7          |
| Suz12         | Syt11         | Tacc2              | Tbc1d15       |
| Tgfbi         | Tkt11         | Tle1               | Tmcc1         |
| Tmed2         | Trio          | Ubelc              | Ube3a         |
| Unc119        | Vcam1         | Wwp1               |               |

**Interaction + T<sub>R</sub>/Tconv**

|               |               |           |          |
|---------------|---------------|-----------|----------|
| 2010309G21Rik | A830080D01Rik | Acs13     | AI851523 |
| Atp8b4        | BF642829      | Blr1      | Cd22     |
| Cd24a         | Cd7           | Clec4n    | Crtam    |
| Dnase113      | Dusp10        | Elovl6    | Eno3     |
| Eomes         | Farsb         | Fscn1     | Garnl4   |
| Gnail         | H2-Ab1        | H2-DMa    | H2-Eb1   |
| H2-Oa         | Ifi204        | Igk-V1    | Itgae    |
| Lrp11         | Lta           | Mettl7a   | Mgst1    |
| Mgst3         | Ms4a6d        | Nol5      | Nrp1     |
| P4hal         | Phc3          | Plxnc1    | Ptplad1  |
| Qser1         | Rnf43         | Slamf6    | Slc35a3  |
| Sor11         | Sostdc1       | Spin2     | Ss18     |
| Stag1         | Tmem158       | Tnfrsf13b |          |

**Interaction + Act/Rest**

|               |       |        |         |
|---------------|-------|--------|---------|
| 1500009L16Rik | Abhd4 | Ahnak  | Arl6ip2 |
| Baspl         | Cetn4 | Coq7   | Csf2rb  |
| Cst7          | Dbf4  | Dbp    | Dsg2    |
| Erlin1        | Fosl2 | Gpr155 | Hiplr   |

|        |         |         |              |
|--------|---------|---------|--------------|
| Irf8   | Itga4   | Lgals1  | LOC100043424 |
| Lrp8   | Lss     | Ly6e    | Mpp6         |
| Mxd4   | Myadm   | Net1    | Nup37        |
| P2rx7  | Pglyrp1 | Rad18   | S100a6       |
| Sae1   | Slc14a1 | Slc2a3  | Slc31a1      |
| Smyd3  | Sqle    | Suv39h1 | Ube2e2       |
| Unc5cl | Vcl     |         |              |

**Interaction + T<sub>R</sub>/Tconv + Act/Rest**

|               |               |               |               |
|---------------|---------------|---------------|---------------|
| 39515         | 0610010012Rik | 1110013L07Rik | 1500011H22Rik |
| 1700019E19Rik | 1810011H11Rik | 2310007D09Rik | 2610002D18Rik |
| 2610024B07Rik | 2700099C18Rik | 2900026A02Rik | 2900054C01Rik |
| 3110052M02Rik | 4631422O05Rik | 4631426J05Rik | 4632434I11Rik |
| 4732435N03Rik | 4930422N03Rik | 4930547N16Rik | 5730590G19Rik |
| 5830431A10Rik | 5830443L24Rik | 5830483C08Rik | 6030408C04Rik |
| 6330500D04Rik | 6430571L13Rik | 6720401G13Rik | 9030611O19Rik |
| 9430020K01Rik | A530021J07Rik | A730095J18Rik | AB124611      |
| Abcb9         | Abhd8         | Abi3bp        | Acp5          |
| Acs14         | Acs16         | Actr3b        | Acvr1         |
| Acvr11        | Adam10        | Afp           | AI449310      |
| AI790276      | AI847670      | AI987662      | Ak311         |
| Alcam         | Aldh1a2       | Amigo2        | Amot11        |
| Angpt12       | Arhgap21      | Arhgap29      | Arl6          |
| Armc7         | AW548124      | B3galnt1      | B9d1          |
| Bag2          | BC030867      | BC037703      | BC043118      |
| BC048355      | BC049807      | Bcl6          | Bmpr1a        |
| Bnip3         | Brcal         | Bspry         | Btbd11        |
| C230085N15Rik | Capg          | Caprin1       | Cask          |
| Casp3         | Cav2          | Ccdc18        | Ccl1          |
| Ccl20         | Ccl3          | Ccl4          | Ccl6          |
| Ccnd3         | Ccr9          | Cd36          | Cd38          |
| Cd80          | Cd8a          | Cd97          | Cdc42ep3      |
| Cdkn1a        | Cenpk         | Cep290        | Cep55         |
| Chi313        | Chi314        | Cisd1         | Cish          |
| Ckap21        | Cngal         | Cnot7         | Cnr2          |
| Cpd           | Crabp2        | Crem          | Csn1s1        |
| Csn2          | Cth           | Ctla4         | Ctnna1        |
| Cxcl9         | Cybb          | Cyp51         | D0H4S114      |
| D12Erttd553e  | D2Erttd435e   | Daxx          | Dck           |
| Dhcr24        | Dmd           | Dmxl2         | Dnahc7b       |
| Dnahc8        | Dtx1          | Dyrk3         | Eaf2          |
| Ebf1          | Ebi3          | EG237749      | EG629059      |
| EG666926      | Ehd3          | Enah          | Enc1          |
| Endod1        | Epas1         | Erol1         | Evi5          |
| Evl           | Fancd2        | Fbxo30        | Fcgr2b        |
| Fdps          | Fer113        | Frmd5         | Fusip1        |
| Fyb           | Gad1          | Galnt10       | Gap43         |
| Garn11        | Gas213        | Gatm          | Gcat          |
| Ggt1a1        | Gjal          | Gkap1         | Gla           |
| Gnb4          | Gpr120        | Gpr160        | Gpr83         |
| Gramd3        | Gzmc          | H2-Aa         | Hbegf         |
| Hccs          | Hcst          | Hemk1         | Hif1a         |
| Hmgcr         | Hmmr          | Hsd11b1       | Hsd17b7       |
| Hsd11         | Hspal1a       | Hspal1b       | Hspa41        |

|                    |         |                    |            |
|--------------------|---------|--------------------|------------|
| Iapp               | Ide     | Idi1               | Ift57      |
| Ift74              | Igfbp4  | Igfbp7             | Igh-6      |
| Igk-C              | Il16    | Il17a              | Il1r2      |
| Il2ra              | Il2rb   | Irf7               | Itpr2      |
| Jakmip1            | Kif11   | Kif18a             | Kif2c      |
| Klf2               | Klf3    | Klra5              | Kpna3      |
| Kpnb1              | Lama5   | Larp4              | Lipa       |
| Lonrf3             | Lpgat1  | Lpl                | Lrrc33     |
| Ltb4dh             | Ly6c1   | Lyz                | Maged2     |
| Mast1              | Mcm8    | Mlf1               | Mkl1       |
| Mphosph1           | Mpz12   | Ms4a4c             | Ms4a6b     |
| Msrb3              | Mt2     | Myh10              | Mylip      |
| Nav1               | Nckap1  | Ndc80              | Ndrq4      |
| Nedd1              | Nedd4   | Nek6               | Neto2      |
| Nmt2               | Nod1    | Nov                | Npas2      |
| Nqo2               | Nsg2    | Nt5e               | Nudcd1     |
| Nudt6              | Nup133  | Nup160             | Nupr1      |
| Odc1               | Orc11   | Osbpl1a            |            |
| OTTMUSG00000005491 |         | OTTMUSG00000016644 |            |
| Oxct1              | Pcx     | Pcyt1a             | Pdcd11g2   |
| Pde2a              | Pdpn    | Penk1              | Perp       |
| Pfn2               | Pglyrp2 | Phf6               | Phldb2     |
| Pi4k2b             | Pik3ip1 | Pkd2               | Pkib       |
| Pkp2               | Plek    | Plk4               | Plod2      |
| Pola1              | Pop1    | Prkcb1             | Prkcq      |
| Procr              | Ptgs1   | Ptprj              | Qpct       |
| Rad51ap1           | Rai14   | Rasgrp2            | Rbp1       |
| Rbpj               | Rgs1    | Rnf180             | Rml1       |
| Rtp4               | Ryk     | S100a1             | Sass6      |
| Satb1              | Sc4mol  | Scd1               | Scpep1     |
| Sema7a             | Serf1   | Serpinb6a          | Serpine2   |
| Sestd1             | Sh3yl1  | Sidt1              | Skp2       |
| Slc12a2            | Slc12a7 | Slc16a5            | Slc25a13   |
| Slc39a8            | Slc4a11 | Slc9a5             | Slfn1      |
| Snai2              | Snx9    | Socs2              | Speer1-ps1 |
| Spp1               | Spred1  | Spry2              | St5        |
| St8sial            | Stard4  | Stk381             | Stx11      |
| Stxbp6             | Tacstd1 | Tbcd19             | Tcf7       |
| Tdrkh              | Tfdp1   | Tfrc               | Tipin      |
| Tmeff2             | Tmem163 | Tnfrsf4            | Tnfrsf9    |
| Tnfsf11            | Tpx2    | Trib2              | Trim12     |
| Trim59             | Tsc22d3 | Tspan4             | Ttc28      |
| Tubb6              | Twsg1   | Uap1               | Upp1       |
| Usp18              | Utp6    | Vegfc              | Wdr51a     |
| Xkrx               | Yes1    | Ypel3              | Zc3h12c    |
| Zdhhc23            | Zfp52   | Zfp608             | Zfp62      |
| Zranb3             |         |                    |            |

**T<sub>R</sub>/Tconv**

|               |               |               |               |
|---------------|---------------|---------------|---------------|
| 1100001H23Rik | 1110032F04Rik | 1500011B03Rik | 2010001M09Rik |
| 2010004M13Rik | 2310010M24Rik | 2310051E17Rik | 2810457I06Rik |
| 4930486G11Rik | 6330442E10Rik | 8430427H17Rik | Acpl2         |
| Adamts6       | Akap7         | Alox5ap       | App           |
| AW742560      | Axin2         | B830008J18Rik | Bambi         |

|               |              |          |               |
|---------------|--------------|----------|---------------|
| BC013712      | BC020489     | Bmyc     | C030002B11Rik |
| C630004H02Rik | Camk2n1      | Ccdc109b | Ccr6          |
| Cd4           | Cd74         | Cerk     | Chn2          |
| Coro2a        | Ctsh         | Cyp2s1   | D13Erttd608e  |
| D8Erttd82e    | Dirc2        | Dst      | Dusp5         |
| E430004N04Rik | Ebi2         | Ecml     | Emb           |
| Etv5          | Foxf2        | Foxp3    | Gabarapl1     |
| Gadd45g       | Galm         | Gbp1     | Gbp3          |
| Gmfg          | Gnaq         | Gng12    | Gphn          |
| Gpr137b-ps    | Gpr177       | Gpr34    | Gsn           |
| Gsta4         | Gsto1        | Gzmk     | Hic1          |
| Hist2h2be     | Hivep3       | Hod      | Hs3st3b1      |
| Hsp90aa1      | Idh2         | Ift122   | Ift80         |
| Igf2r         | Ighg         | Ikzf2    | Ikzf4         |
| Il2           | Il7r         | Itgb3    | Itgb8         |
| Itih5         | Jun          | Kif13a   | Klf6          |
| Klf9          | Klk1         | Lair1    | Lamc1         |
| Larp2         | LOC100040377 | Lrig1    | Lrrc8c        |
| Ly86          | Lycat        | Mctp2    | Med7          |
| Mmd           | Mpeg1        | Mxil     | Nck2          |
| Ndg2          | Nhedc2       | Npas4    | Nr4a2         |
| Nrn1          | Osbp13       | P2ry14   | Paqr7         |
| Pde3b         | Pdlim4       | Phactr2  | Phlda1        |
| Phlpp         | Pim1         | Pip5k1b  | Pla2g4f       |
| Plxnd1        | Pou2af1      | Ppml1    | Prkar1b       |
| Prmt3         | Rabgap11     | Ramp3    | Reep3         |
| Rgmb          | Rgs16        | Rnase4   | Rnase6        |
| Rragd         | Samsn1       | Sccpdh   | Sema4a        |
| Sema4f        | Setd4        | Sgsh     | Sh3bgrl2      |
| Slc22a15      | Slc35d1      | Slc9a9   | Shhg8         |
| Specc1        | Spib         | Suv39h2  | Swap70        |
| Syne2         | Tgfbr1       | Tgfbr3   | Tgif1         |
| Tmie          | Tnfrsf1b     | Tph1     | Tspan9        |
| Tyropb        | Usp27x       | Ypel2    |               |

#### Act/Rest

|               |               |               |               |
|---------------|---------------|---------------|---------------|
| 39697         | 39701         | 0610010F05Rik | 1110067D22Rik |
| 1190002N15Rik | 1810054D07Rik | 1810055G02Rik | 2010012C16Rik |
| 2010317E24Rik | 2410066E13Rik | 2600005O03Rik | 2610036L11Rik |
| 2610318N02Rik | 2610528E23Rik | 2700049P18Rik | 2810417H13Rik |
| 2900002H16Rik | 2900073G15Rik | 3000004C01Rik | 3222402P14Rik |
| 4632428N05Rik | 4921524J06Rik | 4930427A07Rik | 4930506M07Rik |
| 4930523C07Rik | 4930579G24Rik | 5133400G04Rik | 5830405N20Rik |
| 5930433N17Rik | 6720460F02Rik | 6720463M24Rik | 6820424L24Rik |
| 9130404D14Rik | A430107P09Rik | AA467197      | Abi2          |
| Ablim1        | Adam8         | Adrb2         | Afap1         |
| Ahcy          | AI451617      | Akrlc18       | Alad          |
| Aldoc         | Alg8          | Als2cr4       | Ampd1         |
| Ampd3         | Anubl1        | Anxa1         | Anxa2         |
| Arhgap11a     | Arhgap19      | Arhgef18      | Armxc2        |
| Arpc2         | Arrb1         | Art2b         | Asf1b         |
| Asns          | Atad5         | Atf7ip        | Atp10d        |
| Aurka         | AW011738      | AW112037      | Bach2         |
| Baz2b         | BC003324      | BC013672      | BC016495      |

|               |               |               |               |
|---------------|---------------|---------------|---------------|
| BC052328      | BC055324      | Bcl11b        | Blm           |
| Brca2         | Brip1         | Clqdc2        | C79407        |
| C87436        | Cacna2d4      | Cadm1         | Calm3         |
| Camk1d        | Car5b         | Carhsp1       | Cbx5          |
| Ccdc34        | Ccna2         | Ccnb1-rs1     | Ccnb2         |
| Ccne1         | Ccnf          | Ccr5          | Cd27          |
| Cd44          | Cd55          | Cd99          | Cdc20         |
| Cdc25b        | Cdc25c        | Cdc45l        | Cdca2         |
| Cdca3         | Cdca5         | Cdca7         | Cdca8         |
| Cdk6          | Cdkn2c        | Cdkn3         | Cenpe         |
| Cenpi         | Cenpl         | Cenpn         | Cep350        |
| Chchd6        | Chek1         | Chek2         | Chst11        |
| Chsy1         | Chtf18        | Cks1b         | Cldn12        |
| Clic4         | Cobl11        | Comt          | Cryz          |
| Csf2          | Ctla2a        | Ctla2b        | Ctnn          |
| Cxcr6         | D10Bwg1379e   | D17H6S56E-5   | D2Ertd750e    |
| D330050I23Rik | D430019H16Rik | D830025C05Rik | Dbi           |
| Depdclb       | Dgka          | Dhfr          | Dhx58         |
| Diap3         | Dip2c         | Dlg7          | Dnajb4        |
| Dnajc6        | Dsn1          | Dstn          | Dtymk         |
| Dusp16        | Dut           | E030018N11Rik | E130016E03Rik |
| E430016P22Rik | Edg1          | Eeal          | EG240327      |
| Egln3         | Ehd1          | Ehd4          | Ell2          |
| Eme1          | Ercc6l        | Espl1         | Etfb          |
| Exo1          | Ezh2          | F2r           | F630043A04Rik |
| F730047E07Rik | Fabp5         | Fads1         | Fas           |
| Fbxo39        | Fbxo45        | Fbxo5         | Fen1          |
| Fgl2          | Figl1         | Foxm1         | Foxo1         |
| Foxp1         | Gab2          | Galnt3        | Gcnt1         |
| Gemin8        | Gimap6        | Gimap7        | Gins2         |
| Gmcs          | Gpm6b         | Gpr68         | Gprasp1       |
| Gpsm2         | Grap2         | Gtse1         | Gzma          |
| H13           | H19           | H1f0          | H2afx         |
| H2-Ob         | Havcr2        | Hells         | Herc5         |
| Hip1          | Hirip3        | Hist1h2bp     | Hist1h3a      |
| Hist2h3c1     | Hist3h2a      | Hk2           | Hmgb2         |
| Hmgb3         | Hmhal         | Hsh2d         | Ibrdc3        |
| Id2           | Id3           | Ifit1         | Ifit2         |
| Ifit3         | Ifitm1        | Ifitm2        | Ifnar1        |
| Ifng          | Igf2bp3       | Il18rap       | Il4           |
| Il6ra         | Il6st         | Impa2         | Impact        |
| Incenp        | Iqgap3        | Irak1bp1      | Itgb1         |
| Jarid1b       | Jundm2        | Kcnk5         | Kif22         |
| Kif23         | Lamp2         | Lancl2        | Lats2         |
| Lef1          | Lgals3        | Lilrb4        | Litaf         |
| Lman1         | Lmnbl         | LOC320895     | LOC328483     |
| LOC552906     | LOC677168     | Lrrc41        | Lrrk1         |
| Mad2l1        | Map2k3        | Mapre2        | Marcks        |
| Marcks11      | Mcm10         | Mcm3          | Mcm5          |
| Mcoln3        | Mll3          | Mlst2         | Mns1          |
| Mtbp          | Mtmr7         | Mx1           | Mxd3          |
| Mybl2         | Ncapd2        | Ncapg         | Neil3         |
| Nek2          | Nipa2         | Nkg7          | Nlk           |
| Nmral1        | Npal1         | Nsbp1         | Nsl1          |

|         |          |          |           |
|---------|----------|----------|-----------|
| Nudt5   | Oas1g    | Orc6l    | Osgin1    |
| Pacsin1 | Pag1     | Pbx3     | Pdcd1     |
| Pde4b   | Pdk1     | Pdzklip1 | Pgam1     |
| Phf2011 | Pif1     | Pitpnc1  | Plekha8   |
| Pmaip1  | Pold3    | Pole2    | Pole3     |
| Pparg   | Ppfibp1  | Ppic     | Ppih      |
| Ppil5   | Ppp1r13b | Ppp3cc   | Prdx4     |
| Prim2   | Prkca    | Prr11    | Prr6      |
| Prss16  | Psat1    | Psmc3ip  | Ptgfrn    |
| Ptpn3   | Ptpn9    | Ptprs    | Pyhin1    |
| Rab3ip  | Rab6b    | Racgap1  | Ralgps2   |
| Rapgef6 | Raph1    | Rbbp8    | Rcc1      |
| Recql4  | Repin1   | Rfc3     | Rfc4      |
| Rfc5    | Rhoh     | Rhoq     | Rnf157    |
| Rnf213  | Rrad     | Rrm2     | Rsad2     |
| Runx2   | Rxra     | Samd9l   | Sap30     |
| Scin    | Sec24d   | Sell     | Serpina3g |
| Sesn1   | Sh3bgr1  | Siva1    | Slc15a3   |
| Slc19a2 | Slc28a2  | Slc2a1   | Slc2a6    |
| Slc38a2 | Slc39a4  | Slco4a1  | Slfn5     |
| Smad7   | Smc2     | Smpdl3b  | Sorcs2    |
| Spag5   | Spc24    | Spc25    | Srpk2     |
| St14    | St8sia6  | Stc2     | Stmn1     |
| Strap   | Stx1a    | Syce2    | Tacc3     |
| Tbx21   | Tcf12    | Tcf19    | Tex15     |
| Tfdp2   | Tg       | Thada    | Tjp2      |
| Tkl     | Tlr7     | Tmem107  | Tmem180   |
| Tmem2   | Tmem38b  | Tmem48   | Tmem63a   |
| Tmem97  | Tnfrsf1a | Tnfsf13b | Tnfsf9    |
| Tnik    | Top2a    | Tpil     | Traip     |
| Trim30  | Trim37   | Trip13   | Tspan31   |
| Ttf2    | Ttk      | Tubel    | Txk       |
| Ugcg    | Uhrf1    | Utrn     | Uxs1      |
| Vdr     | Wdhd1    | Wdr90    | Whsc1     |
| Wispl   | Zbtb4    | Zdhhc2   | Zfp319    |
| Zfp367  | Zwilch   |          |           |

**T<sub>R</sub>/Tconv + Act/Rest**

|               |               |               |               |
|---------------|---------------|---------------|---------------|
| 1200016E24Rik | 1500005K14Rik | 2210010C17Rik | 2310014D11Rik |
| 2610019F03Rik | 2810001G20Rik | 2810433K01Rik | 2810439F02Rik |
| 2900024C23Rik | 5930435M05Rik | 6720467C03Rik | 9630013D21Rik |
| A130040M12Rik | A130092J06Rik | A930005H10Rik | Acss1         |
| Actn1         | Adam9         | Adh1          | AI467606      |
| Als2cl        | Anln          | Anxa4         | Arl4c         |
| Arl5a         | Armex4        | Aspm          | Atplb1        |
| Atpif1        | Atxn7l4       | AU019833      | Aurkb         |
| AV071699      | B3galt4       | BC038822      | BC053440      |
| BC085284      | Bcat1         | Bcl2l2        | Bhlhb2        |
| Birc5         | Bri3          | Btg2          | Bub1          |
| Bubl1         | C030044B11Rik | C330027C09Rik | Cbr1          |
| Ccdc50        | Ccdc99        | Ccl5          | Ccnb1         |
| Ccne2         | Ccpg1         | Cdc2a         | Cdc6          |
| Cenpa         | Cenpf         | Cenph         | Cenpp         |
| Ckap2         | Cks2          | Clspn         | Cnksr3        |

|               |           |         |               |
|---------------|-----------|---------|---------------|
| Cpe           | Csda      | Cyfip1  | D16Bwg1543e   |
| D630039A03Rik | Dapl1     | Ddx58   | Depdc1a       |
| Dna21         | Dse       | Dsp     | Dtl           |
| Dusp4         | Dyrk2     | Dzip1   | E030037K03Rik |
| E2f7          | E2f8      | Ect2    | EG666231      |
| Emp1          | Enpp4     | Esco2   | Fanca         |
| Fdft1         | Gas2      | Gem     | Gins1         |
| Gmn           | Gpld1     | Gpr18   | Gzmb          |
| Hmgn3         | I112rb1   | I11rl2  | Inadl         |
| Irf4          | Kcnk6     | Kctd9   | Kif20a        |
| Kif4          | Kntc1     | Kpna2   | Lass6         |
| Lig1          | LOC625360 | Lxn     | Mcm6          |
| Mdfic         | Melk      | Mki67   | Mllt4         |
| Mt1           | Myo1c     | Myo1e   | Ncapg2        |
| Ncapg         | Neb       | Nfil3   | Niban         |
| Npc2          | Nr4a3     | Ntrk3   | Nuf2          |
| Nusap1        | Oas12     | Otud1   | P2ry5         |
| Pbk           | Pebp1     | Phb     | Pik3r5        |
| Plagl1        | Plk1      | Plp2    | Plscr1        |
| Pole          | Prc1      | Prdm1   | Preli2        |
| Prg4          | Prim1     | Prnp    | Pros1         |
| Psrc1         | Rad51     | Rapgef4 | Rassf2        |
| Rgs14         | Rhobtb2   | Rnf144  | Rnf167        |
| Scml4         | Sepp1     | Sgk3    | Sgol1         |
| Sgol2         | Shcbp1    | Shmt1   | Sit1          |
| Slc43a3       | Slfn8     | Shhg3   | Sp100         |
| Spsb1         | Stil      | Synpo   | Tcp1112       |
| Tcrb-V13      | Tcrb-V8.2 | Tgfbr2  | Tiam1         |
| Tmbim1        | Tmem142b  | Tmem71  | Tmod1         |
| Tmpo          | Tnfrsf18  | Tns1    | Tyki          |
| Tyms          | Ube2c     | Ube2t   | Vps37b        |
| Wee1          | Zbtb32    |         |               |

**The list of differentially expressed genes identified by comparing gene expression profiles of resting and activated conventional CD4<sup>+</sup> T cells and adaptive Treg cells from Figure 1B.**

**Act/aT<sub>R</sub>**

|               |               |               |               |
|---------------|---------------|---------------|---------------|
| 1100001H23Rik | 1110034A24Rik | 1700029I15Rik | 1700097N02Rik |
| 2210018M11Rik | 2410002O22Rik | 2410187C16Rik | 2610101N10Rik |
| 2610209A20Rik | 2700023E23Rik | 2700078E11Rik | 2810457I06Rik |
| 4921509J17Rik | 4921517N04Rik | 4930461P20Rik | 4933433P14Rik |
| 6030422H21Rik | 6330416L07Rik | 6820431F20Rik | 7530404M11Rik |
| A130004G11Rik | A830080D01Rik | Aasdhppt      | Abce1         |
| Acbd4         | Acs11         | Adpgk         | AI480535      |
| Akap13        | Akt3          | Ammecr11      | Anapc1        |
| Ankrd49       | Ap2a2         | Api5          | Arhgap26      |
| Arl8b         | Arrdc4        | Asb6          | Asrgl1        |
| Atr           | AU020177      | AU044698      | B230206F22Rik |
| Bach2         | BC013712      | BC021614      | BC029214      |
| Bcl3          | Blr1          | Bmi1          | Clqb          |
| C330007P06Rik | Camsap111     | Cbx1          | Ccdc86        |
| Ccdc90b       | Ccl6          | Ccnc          | Ccr5          |
| Cd22          | Cd82          | Cdk5r1        | Centd1        |
| Cep152        | Chka          | Cnn3          | Cnot4         |
| Cnot6         | Coro1b        | Cpne3         | Crip1         |
| Csflr         | Csf2rb        | Ctsb          | Ctsd          |
| Cxcl10        | Cxcr6         | Cyba          | D130037M23Rik |
| D16Ertd472e   | Dap           | Dctd          | Dennd2c       |
| Dkc1          | Dpy1913       | Dr1           | Dtwd2         |
| Dusp10        | E030004N02Rik | E030018N11Rik | E2f6          |
| Ech1          | Echdc1        | Ehbp111       | Eif3j         |
| Eif4b         | Eif5          | Eif5b         | Erc1          |
| Esf1          | Exoc4         | Ext1          | Farsb         |
| Fbxw11        | Flot1         | Fnip1         | Ftsj3         |
| Gapvd1        | Gata3         | Gdi2          | Gemin4        |
| Gmfb          | Gnpnat1       | Gpatch4       | Gpbp1         |
| Gphn          | Gpr137b-ps    | Gpr83         | Grb2          |
| Gspt1         | Gtf2h1        | Gtf2ird1      | Gzma          |
| Gzmk          | H2afy2        | H2-DMb2       | Hdh           |
| Heatr3        | Hectd2        | Hmgcs1        | Hnrpd1        |
| Hod           | Homer1        | Hook1         | Hpse          |
| Hsd17b12      | Ide           | Idh1          | Ier3          |
| Ifngr1        | Igf2r         | Igh-6         | Ighg          |
| Il10ra        | Il2           | Isg2011       | Isoc1         |
| Itgax         | Itm2c         | Itpk1         | Josd3         |
| Kctd12        | Kif16b        | Kif3b         | Krr1          |
| Krt42         | Lactb2        | Ldlr          | Lime1         |
| LOC100040799  | Lrig1         | Lspl          | Lst1          |
| Ly86          | Lyst          | Map3k7        | Matk          |
| Matr3         | Mcart6        | Me2           | Mel13         |
| Memol         | Metap1        | Mett11        | Mett17a       |
| Mex3c         | Mier3         | Mlstd2        | Mtfr1         |
| Myo10         | Myo1f         | Myo1g         | NA            |
| Naga          | Naip2         | Nbeal2        | Ncaph2        |
| Nck2          | Nek4          | Nfkbia        | Nfkbie        |
| Nfx1          | Nin           | Noc31         | Nol11         |



|           |           |          |            |
|-----------|-----------|----------|------------|
| Nol8      | Otud4     | P2ry14   | P4ha1      |
| Paip1     | Parp3     | Pcgf6    | Pdcl       |
| Plxnc1    | Pms2      | Pphln1   | Ppp2r5e    |
| Pprc1     | Prdm2     | Prg4     | Prkrir     |
| Psmb8     | Psme4     | Ptp4a3   | Pygl       |
| Rab43     | Rasa1     | Rasl11b  | Rbm14      |
| Rev1      | Rfc1      | Rg9mtd2  | Rpl3       |
| Rrp12     | Runx3     | Rusc1    | Sacs       |
| Scyl1bp1  | Sdcbp2    | Sec61a2  | Senp2      |
| Senp8     | Serpinb6b | Setd5    | Sirpa      |
| Skap2     | Slamf6    | Slc16a10 | Slc2a3     |
| Slc35a3   | Slc35d2   | Slc44a1  | Smc6       |
| Smyd3     | Snhg7     | Snord22  | Snx13      |
| Spin2     | Spred1    | Srbd1    | Srebf2     |
| Ssl8      | Ssb       | Ssh1     | St6galnac6 |
| Stag1     | Strbp     | Suz12    | Tacc2      |
| Taf4b     | Tasp1     | Tcn2     | Tgfbf1     |
| Tgm2      | Thada     | Tigd2    | Tkt11      |
| Tmcc1     | Tmem135   | Tmem176a | Tmem33     |
| Tnfrsf13b | Tnpo1     | Tpst2    | Trim37     |
| Trnt1     | Trp53     | Trp53i11 | Tspan6     |
| Tspan9    | Tsr1      | Ube2v2   | Ube3a      |
| Ublcp1    | Uchl3     | Ugcg     | Unc119     |
| Usp15     | Utp6      | Vav2     | Wdr77      |
| Wwp1      | Xpr1      | Zdhhc20  | Zfp238     |
| Zfp28     | Zfp365    | Zfp647   | Zfp667     |
| Zfr       |           |          |            |

**Act/T<sub>R</sub> + Act/Rest**

|               |               |               |               |
|---------------|---------------|---------------|---------------|
| 1110057K04Rik | 1500009L16Rik | 1700097N02Rik | 2310031A07Rik |
| 3110045G13Rik | 4930583H14Rik | 5730469M10Rik | 5930435M05Rik |
| A530021J07Rik | A730095J18Rik | AA408296      | Actg2         |
| Adam8         | Ahnak         | AI315324      | AI662791      |
| AI851523      | Akt3          | Ankrd29       | Anxa1         |
| Anxa2         | Asb2          | Atplb1        | AW548124      |
| B4galnt4      | Bace2         | Bach2         | Bad           |
| Baiap3        | BC016423      | BC031781      | BC049806      |
| C1qa          | C3            | C920006C10Rik | Camsap111     |
| Casp1         | Casp4         | Ccdc132       | Ccdc28b       |
| Ccl1          | Ccl6          | Ccr2          | Cd55          |
| Cdc25b        | Cdk5r1        | Cebpa         | Cental        |
| Chi3l3        | Chi3l4        | Chst11        | Clec4n        |
| Cnksr3        | Cnn3          | Cnot2         | Coro2a        |
| Cst7          | Cxcl9         | Cxcr3         | D10Bwg1379e   |
| D3Ert254e     | Dnajb4        | Dnase113      | Dsg2          |
| Ebi3          | Efhd2         | Epas1         | Fcgr2b        |
| Fgf13         | Fgl2          | Fkbp5         | Foxo1         |
| Foxp1         | Frmd4b        | Gab2          | Gapdh         |
| Garnl4        | Gcnt1         | Glipr2        | Glrx          |
| Gnail         | Gstt2         | Gzmb          | H2-DMA        |
| Havcr2        | Hiplr         | Hod           | Ifi204        |
| Ifi205        | Ifitm1        | Ifitm2        | Ifng          |
| Igf2bp3       | Igfbp4        | Igh-6         | Illr2         |
| Il1rl1        | Il3ra         | Inpp11        | Klrg1         |

|           |           |          |              |
|-----------|-----------|----------|--------------|
| Ksr1      | Lgals1    | Lilrb4   | LOC100043424 |
| Lonp2     | Lpl       | Lrrk1    | Mapre2       |
| Mex3b     | Mgst1     | Mt2      | Myadm        |
| Myo1f     | NA        | Niban    | Nkg7         |
| Nol8      | Nolc1     | Nqo2     | ORF34        |
| Penk1     | Phc3      | Plcb4    | Plxdc1       |
| Prpf4b    | Ptk2      | Ptpn13   | Rab6ip1      |
| Rail4     | Rapgef6   | Rcan3    | Rhoc         |
| Rnf128    | Rps4y2    | Runx2    | Rxra         |
| S100a11   | Saa3      | Scin     | Serinc1      |
| Serpina3g | Serpinb6a | Sfrs3    | Sh3bgr1      |
| Sh3gl3    | Slc15a3   | Slc39a4  | Slc4a1       |
| Slco4a1   | Smpdl3b   | Sostdc1  | Sox4         |
| St8sia1   | St8sia6   | Tbcd1d15 | Tbcd1d16     |
| Tgfbi     | Thada     | Timm9    | Tjp2         |
| Tle1      | Tnfsf13b  | Trio     | Tubgcp5      |
| Ugcg      | Vcam1     | Yod1     | Zfp644       |
| Znrf3     |           |          |              |

**Act/aT<sub>R</sub> + aT<sub>R</sub>/Rest**

|               |               |               |               |
|---------------|---------------|---------------|---------------|
| 39702         | 0610008C08Rik | 0610013E23Rik | 0910001A06Rik |
| 1110032F04Rik | 1110038B12Rik | 1110061A14Rik | 1190002N15Rik |
| 1190007I07Rik | 1200013B08Rik | 1200015A19Rik | 1200015F23Rik |
| 1500005K14Rik | 1700008J07Rik | 1810015A11Rik | 1810054D07Rik |
| 2010002N04Rik | 2010004M13Rik | 2010204K13Rik | 2010309G21Rik |
| 2010315L10Rik | 2210010N04Rik | 2310008H09Rik | 2310014H01Rik |
| 2410002O22Rik | 2410018M08Rik | 2410127L17Rik | 2610002D18Rik |
| 2610024B07Rik | 2610027C15Rik | 2610027H17Rik | 2610034E01Rik |
| 2610201A13Rik | 2700078E11Rik | 2700099C18Rik | 2810452K22Rik |
| 3110001A13Rik | 3110082I17Rik | 4631422O05Rik | 4632434I11Rik |
| 4930422N03Rik | 4930505D03Rik | 4930534B04Rik | 4930579C15Rik |
| 5033414K04Rik | 5033430I15Rik | 5630401D24Rik | 5730449L18Rik |
| 5730508B09Rik | 5730590G19Rik | 5730596K20Rik | 5830431A10Rik |
| 5830443L24Rik | 5830483C08Rik | 5930405F01Rik | 6030408C04Rik |
| 6230416J20Rik | 6330416L07Rik | 6330442E10Rik | 6330500D04Rik |
| 6330503K22Rik | 8430406I07Rik | 9130227C08Rik | 9230114K14Rik |
| 9430029L20Rik | A030009H04Rik | A130090K04Rik | Aak1          |
| AB124611      | Abca7         | Abcb9         | Abcd1         |
| Abcg1         | Abcg3         | Abhd8         | Acp1          |
| Acp5          | Acsl1         | Acsl3         | Acsl4         |
| Acsl6         | Acss2         | Acvr2a        | Adamts6       |
| Add1          | Adss          | AI447560      | AI449310      |
| AI467606      | AI480653      | AI788777      | Ak1           |
| Akap1         | Akna          | Akr1c13       | Akr1c18       |
| Alcam         | Aldh18a1      | Alg13         | Alkbh4        |
| Alox5ap       | Alpk2         | Angpt12       | Ankrd13b      |
| Ankrd32       | Ankrd41       | Anxa6         | Aplp2         |
| Aqp3          | Arhgap21      | Arhgap24      | Arhgap9       |
| Arhgdig       | Arhgef18      | Arl6ip6       | Arrb2         |
| Atpla2        | Atp2a3        | Atp6v0a2      | Atrx          |
| Atxn7l4       | Avpr1a        | AW228836      | AW555464      |
| AW742560      | B4galnt1      | Baz1b         | BC048355      |
| BC049807      | BC052328      | BC053440      | BC067047      |
| BC085284      | Bcap29        | BF642829      | B1m           |

|               |               |               |               |
|---------------|---------------|---------------|---------------|
| Bmi1          | Bmpr2         | Brcal         | Brip1         |
| Btg3          | C230093N12Rik | C230096C10Rik | C730049O14Rik |
| Cacybp        | Canx          | Casc5         | Casp7         |
| Cbx5          | Ccb12         | Ccdc18        | Ccdc58        |
| Ccdc86        | Ccm2          | Ccnd3         | Ccng1         |
| Ccr8          | Ccr9          | Ccrn41        | Cct4          |
| Cd1d1         | Cd247         | Cd3g          | Cd52          |
| Cd53          | Cd7           | Cd74          | Cd79b         |
| Cd96          | Cd97          | Cdc25a        | Cdc42ep3      |
| Cdc42se1      | Cdca7         | Cdk2ap2       | Cdkn1a        |
| Cdkn2d        | Cenpn         | Centg2        | Cep27         |
| Cep290        | Cerk          | Cetn4         | Chchd6        |
| Chek1         | Chpt1         | Cisd1         | Clec2i        |
| Clspn         | Cnn2          | Cnot6         | Cnot7         |
| Coq7          | Coro1c        | Coro7         | Cpd           |
| Cradd         | Crem          | Ctdsp1        | Ctnna1        |
| Ctnna11       | Ctsh          | Cut11         | Cyb5b         |
| Cybb          | Cypla1        | Cyplb1        | Cyp51         |
| D0H4S114      | D12Ertd647e   | D13Wsu177e    | D15Ertd621e   |
| D18Ertd653e   | D1Bwg0212e    | D330027G24Rik | D430020J02Rik |
| D5Wsu178e     | D8Ertd457e    | Dclrela       | Ddef1         |
| Ddx1          | Ddx19a        | Deadc1        | Dgcr8         |
| Dhcr24        | Dhrs13        | Dhx37         | Dhx58         |
| Dis3          | Dkc1          | Dld           | Dleu2         |
| Dnajc18       | Dnmt3a        | Dnmt3b        | Dpp4          |
| Dpp8          | Dsp           | Dst           | Dtl           |
| Dtx1          | Dusp2         | Dyn112        | Dynlt1        |
| Dyrk3         | Dzip1         | E2f1          | E430004N04Rik |
| Ebi2          | Ebp1          | Edg6          | Eef1e1        |
| EG432879      | EG667823      | Ehd3          | Eif1a         |
| Eif2s3x       | Eif4e3        | Eif4enif1     | Eif5a         |
| Eif5b         | Elk3          | Emb           | Emp3          |
| Eny2          | Epb4.112      | Epsti1        | Etf1          |
| Etnk1         | Evl           | Exoc2         | Exosc2        |
| F830021D11Rik | Fancd2        | Fanci         | Farp2         |
| Fas           | Fastkd3       | Fbxl20        | Fbxo28        |
| Fbxo30        | Fbxo39        | Fbxw4         | Fdft1         |
| Fer113        | Fgfrlop       | Fnbp1         | Fnbp11        |
| Freq          | Fusip1        | Fyb           | Garn11        |
| Gart          | Gcsh          | Gemin6        | Gimap1        |
| Gimap4        | Gimap7        | Gins3         | Gjal          |
| Gmfg          | Gnl3          | Got1          | Gpaal         |
| Gphn          | Gpr120        | Gpsm3         | Gramd3        |
| Grap          | Gsdmdc1       | Gsn           | Gspt1         |
| Gtf2h4        | Gtf2i         | Gtse1         | H2-Aa         |
| H2-Ab1        | H2-D1         | H2-Eb1        | H2-Q8         |
| H2-T23        | Hat1          | Hbegf         | Hbp1          |
| Hbs11         | Hcst          | Hdh           | Hells         |
| Hemgn         | Hirip3        | Hist1h1c      | Hist1h1e      |
| Hivep3        | Hmgcr         | Hmgcs1        | Hmhal         |
| Hmmr          | Hn11          | Hnrpl1        | Hook2         |
| Hsd17b11      | Hsd17b7       | Hspa41        | Hspa9         |
| Hspd1         | Hvcn1         | Iars          | Idi1          |
| Ifi27         | Ifih1         | Ift57         | Ift74         |

|         |                  |           |           |
|---------|------------------|-----------|-----------|
| Igflr   | Igj              | Igk-C     | Igk-V1    |
| Il16    | Il27ra           | Il2ra     | Il7r      |
| Il9     | Insig1           | Ints4     | Ints7     |
| Irf4    | Irf7             | Isg2011   | Itga4     |
| Itgb3   | Itgb7            | Itpa      | Itpkb     |
| Itpr2   | Jakmip1          | Kbtbd11   | Kcnn4     |
| Kctd14  | Kdelc1           | Kif21b    | Kif3b     |
| Klf2    | Klf3             | Klf6      | Kpna3     |
| Kpnb1   | L1cam            | Larp4     | Lcor1     |
| Leol    | LOC100040297     | LOC625360 | LOC665689 |
| Lonrf3  | Lrdd             | Lrig1     | Lrrc33    |
| Lrrc40  | Lrrc58           | Lrrc59    | Lsm12     |
| Lsm2    | Lta              | Ly6e      | Lyar      |
| Lycat   | Lyn              | Lyz       | Lyzs      |
| MacroD2 | Madd             | Maff      | Map3k7    |
| Mapk6   | Mars2            | Mast1     | Mcm8      |
| Mctp2   | Med14            | Med7      | Mobkl2a   |
| Mosc2   | Mpeg1            | Mphosph1  | Mpdn      |
| Mpp6    | Mpp7             | Mpz11     | Mrpl50    |
| Mrps2   | Ms4a4b           | Ms4a4c    | Ms4a6c    |
| Mtdh    | Mxd4             | Myc       | Mycbp     |
| Myl4    | Mylc2b           | Mylip     | Myo5a     |
| Myohd1  | NA               | Nanos1    | Nap111    |
| Narg3   | Nasp             | Nat13     | Nat5      |
| Ncl     | Ncoa2            | NdrG4     | Ndufa121  |
| Nedd1   | Nefh             | Neil3     | Nek6      |
| Neto2   | Nfix             | Nhedc2    | Nmb       |
| Nmi     | Nmt2             | Noc41     | Nod1      |
| Nol14   | Nolc1            | Npal3     | Npas2     |
| Nr4a2   | Nr4a3            | Nsg2      | Nt5e      |
| Nudcd1  | Nudcd2           | Nudt6     | Nup133    |
| Nup155  | Nup160           | Nup43     | Nv1       |
| Ociad2  | Odc1             | Oip5      | Orc21     |
| Osbpl1a | OTTMUSG000016644 | Oxct1     | P2rx4     |
| P2rx7   | Pa2g4            | Pabpc4    | Papss2    |
| Paqr7   | Paxip1           | Pbef1     | Pbx2      |
| Pbxip1  | Pcbp3            | Pcnt      | Pdgfb     |
| Pdlim5  | Pdss1            | Peli2     | Perp      |
| Pfas    | Pfn2             | Pglyrp2   | Pgs1      |
| Phactr2 | Phb              | Phf11     | Phf15     |
| Phf16   | Phlda1           | Phtf2     | Pi4k2b    |
| Pigr    | Pik3ip1          | Pip5k1b   | Pitpnm1   |
| Pitrm1  | Pkp3             | Pla2g12a  | Plac8     |
| Plagl2  | Plekhf2          | Plod2     | Plod3     |
| Plxnc1  | Pole3            | Pop1      | Pphln1    |
| Ppil5   | Ppp2r5a          | Ppwd1     | Prkcb1    |
| Prnp    | Prpf31           | Prps1     | Psmb10    |
| Psmc6   | Psrc1            | Ptgfrn    | Ptp4a1    |
| Ptpla   | Ptpn18           | Ptprcap   | Pttg1     |
| Pyhin1  | Rab23            | Rab37     | Rac2      |
| Rad18   | Rad51ap1         | Ramp1     | Ramp3     |
| Ranbp5  | Rasa3            | Rasgrp2   | Rbm18     |
| Rbm44   | RbmX2            | Rbpj      | Rcsd1     |
| Rdh12   | Rel11            | Rexo2     | Rfc2      |

|           |           |          |           |
|-----------|-----------|----------|-----------|
| Rg9mtd2   | Rgs14     | Rgs16    | Rheb11    |
| Rin3      | Rnf11     | Rnf135   | Rnf149    |
| Rnf4      | Rorc      | Rps6ka1  | Rpusd2    |
| Rragd     | Rrs1      | Rsc1a1   | Rsl1d1    |
| Rtp4      | Rusc1     | Sacs     | Samd9l    |
| Sass6     | Satb1     | Sc4mol   | Sc5d      |
| Scarb1    | Scotin    | Sdf4     | Sec24a    |
| Seh1l     | Sema4a    | Sema4f   | Serpine2  |
| Sestd1    | Sft2d2    | Sgsh     | Sh2d1a    |
| Sh3yl1    | Shkbp1    | Shmt1    | Shmt2     |
| Sigirr    | Sival     | Skap1    | Skil      |
| Skp2      | Sla       | Slc12a2  | Slc12a7   |
| Slc14a1   | Slc16a10  | Slc19a1  | Slc19a2   |
| Slc25a45  | Slc29a1   | Slc31a1  | Slc35f2   |
| Slc39a8   | Slc4a11   | Slc5a6   | Slc6a6    |
| Slc7a6    | Slc9a5    | Slfn1    | Slfn2     |
| Slfn3     | Smarcc1   | Smc2     | Smc6      |
| Smn1      | Smox      | Smpd4    | Smpd13a   |
| Smyd3     | Soat1     | Socs2    | Socs3     |
| Socs4     | Sorl1     | Spata5   | Specc1    |
| Spin4     | Spred1    | Sqle     | Srd5a1    |
| Srf       | Srm       | Ssb      | Ssh2      |
| St5       | St6gal1   | St8sia4  | Stard4    |
| Stat4     | Stat5a    | Stk10    | Stk17b    |
| Stk381    | Surf1     | Suv39h2  | Syp       |
| Tacstd1   | Taf4b     | Tardbp   | Tasp1     |
| Tbcd1d1   | Tbcd1d10c | Tbcd1d19 | Tbcd1d2b  |
| Tbrg4     | Tceb1     | Tcf12    | Tcrg      |
| Tdrkh     | Tfrc      | Tgfbr1   | Tgif1     |
| Thop1     | Thyl      | Timm8a1  | Tlcd1     |
| Tle1      | Tmem106b  | Tmem107  | Tmem154   |
| Tmem19    | Tmem48    | Tmem65   | Tmem71    |
| Tmem97    | Tmepai    | Tmie     | Tmprss3   |
| Tnfaip3   | Tnfaip8l2 | Tns1     | Topors    |
| Tpcn1     | Tpm3      | Traf3ip3 | Traf6     |
| Trak1     | Trat1     | Trib3    | Trim12    |
| Trim14    | Trmt11    | Trp53    | Trp53rk   |
| Trps1     | Tsc22d3   | Tspan5   | Tspo      |
| Tsr2      | Ttc30a1   | Tusc4    | Twsg1     |
| Txlna     | Txnip     | Txnrd3   | Tyki      |
| Tyms      | Tyrobp    | Ube2e2   | Uchl5     |
| Uhrf1     | Umps      | Usf2     | Usp22     |
| Usp27x    | Usp31     | Usp46    | Utp6      |
| Vkorc1l11 | Vps37c    | Wdhd1    | Wdr18     |
| Wdr5      | Wdr68     | Wdr76    | Xcl1      |
| Xkr5      | Xpot      | Xpr1     | Xrcc2     |
| Ypel2     | Zap70     | Zbtb7b   | Zfp106    |
| Zfp367    | Zfp52     | Zfp62    | Zkscan6   |
| Zmat3     | Zmyml     | Zranb3   | Zwint     |
| Act/Rest  | I14       | I118rap  | H2-DMA    |
| Itgb1     | Itgae     | Mt1      | Clqdc2    |
| Ctnn      | Anxa4     | Lag3     | Zdhhc2    |
| Asns      | Cd160     | Myole    | Pdzkclip1 |
| Icos      | Nrp1      | Stc2     | Agpat4    |

|               |               |               |               |
|---------------|---------------|---------------|---------------|
| Ehd1          | Id2           | BC003324      | Tiam1         |
| Ela1          | Prr6          | 9230110J10    | Tmem180       |
| Lxn           | Abhd4         | Lif           | Sh3bgr1       |
| D630039A03Rik | Tnfsf11       | Mxd3          | Apobec3       |
| Serh1         | BC033915      | Pif1          | Nelf          |
| Ptger2        | Tspan31       | Nfatc1        | 6720467C03Rik |
| Nmral1        | Cdkn2c        | Ccl3          | Hmgn3         |
| 2610318N02Rik | H2afx         | 1500032O14Rik | Arpc2         |
| Acvr11        | Rnf145        | 4930523C07Rik | C130098B18Rik |
| Zdhhc17       | NA            | Rab3ip        | Klf7          |
| Slc35a5       | Armcx2        | Sap18         | Pitpnc1       |
| Trim30        | Pml           | Dse           | Zbtb24        |
| Rassf3        | Zfp397        | Sesn1         | D930001B02    |
| Pcmt2         | Tgfbr3        | Rbbp6         | Nedd41        |
| 1700094D03Rik | Txk           | Nxf1          | Calm1         |
| Ppig          | 6430527G18Rik | Foxo1         | P2ry5         |
| Grap2         | Rrm2b         | Magef1        | Enc1          |
| Galnt6        | LOC552906     | Smad7         | Zfp192        |
| Mll3          | Atp8a1        | Amy2          | Tanc1         |
| Cd55          | Me2           | Usp53         | Pus3          |
| Sf3b3         | 1110007A13Rik | Il6st         | Thap2         |
| Igfbp4        | Srpk2         | Clk4          | Pias2         |
| Foxp1         |               |               |               |

**Act/Rest + aT<sub>R</sub>/Rest**

|               |               |               |               |
|---------------|---------------|---------------|---------------|
| 39697         | 1110038D17Rik | 1110067D22Rik | 1500011H22Rik |
| 1700041C02Rik | 2010317E24Rik | 2210012G02Rik | 2310010G23Rik |
| 2310010M24Rik | 2310035C23Rik | 2410066E13Rik | 2610036L11Rik |
| 2700049P18Rik | 2810417H13Rik | 2810433K01Rik | 2900073G15Rik |
| 4632428N05Rik | 4930523C07Rik | 4930534B04Rik | 4930547N16Rik |
| 4933413A10Rik | 5133400G04Rik | 5830405N20Rik | 5930433N17Rik |
| 9130208E07Rik | 9630013D21Rik | A930005H10Rik | Abcg3         |
| Acvr11        | Adam19        | Adam9         | Add3          |
| Adhl          | Adrb2         | Afap1         | Afp           |
| Ahcy          | Ahr           | AI790276      | Alad          |
| Amigo2        | Ampd1         | Anln          | Anp32e        |
| Ap3m2         | Arhgap11a     | Arhgap19      | Arhgap21      |
| Arhgap29      | Arhgef18      | Arl6          | Arrb1         |
| Asflb         | Aspm          | Atpif1        | Aurka         |
| Aurkb         | AV071699      | AW011738      | B430306N03Rik |
| BB001228      | BC004022      | BC038822      | BC055324      |
| Bcl2a1a       | Bhlhb2        | Birc5         | Btbd11        |
| Bub1          | Bub1b         | C030034I22Rik | Cacna2d4      |
| Capg          | Car2          | Card6         | Casp3         |
| Casp7         | Cbr1          | Cbx4          | Ccdc34        |
| Ccna2         | Ccnb1         | Ccnb1-rs1     | Ccnb2         |
| Ccnd1         | Ccne1         | Ccnf          | Ccpg1         |
| Cd200         | Cd247         | Cd44          | Cdc20         |
| Cdc2a         | Cdc6          | Cdca2         | Cdca3         |
| Cdca5         | Cdca8         | Cdk6          | Cdkn3         |
| Senpa         | Senpe         | Senpf         | Senpl         |
| Senpn         | Cep55         | Chsy1         | Chtf18        |
| Cish          | Ckap2         | Ckap21        | Cks1b         |
| Cks2          | Cln8          | Clspn         | Cnga1         |

|               |               |               |               |
|---------------|---------------|---------------|---------------|
| Cobl11        | Cpm           | Crlf3         | Cryz          |
| Csda          | Ctla2a        | Ctla2b        | Ctla4         |
| Cyp2d22       | D14Abb1e      | D16Bwg1543e   | D230012E17Rik |
| D2Ert750e     | D330050I23Rik | Daam1         | Daxx          |
| Depdc1a       | Dgka          | Dut           | Dyrk2         |
| E2f8          | Ebi2          | Ect2          | Edg1          |
| Egln3         | Ell2          | Eme1          | Endod1        |
| Esp11         | Eya2          | Ezh2          | F2r           |
| F630043A04Rik | F730047E07Rik | Fabp5         | Fen1          |
| Figl1         | Fmo5          | Gas2          | Gem           |
| Ggt1a1        | Gins2         | Gmn           | Gpr146        |
| Gprasp1       | H13           | H2-T24        | Herc5         |
| Hk2           | Hmgb2         | Hmgb3         | Hmmr          |
| Ifit2         | I112rb1       | I12rb         | Impa2         |
| Incenp        | Iqgap3        | Itk           | Jhdml1        |
| Kif11         | Kif1b         | Kif20a        | Kif22         |
| Kif2c         | Kif4          | Klhdc5        | Kntc1         |
| Kpna2         | Lass6         | Ldlrap1       | Leprot11      |
| Lgals3        | Lig1          | Litaf         | Lmnbl         |
| Lrrc1         | Mad211        | Maf           | Map4k3        |
| Marcks11      | Mbn13         | Mcm3          | Mcm5          |
| Mcm6          | Mcm7          | Melk          | Mitd1         |
| Mki67         | Mxd3          | Mybl2         | Myo1c         |
| NA            | Ncapd2        | Ncapg         | Ncapg2        |
| Ncaph         | Ndc80         | Nedd4         | Nek2          |
| Nfkbil2       | Nlk           | Nrp1          | Ntrk3         |
| Nuf2          | Nusap1        | Osbp13        | Osbp19        |
| Pag1          | Parp16        | Pbk           | Pdcd1         |
| Pdcd11g2      | Pdk1          | Pebp1         | Plagl1        |
| Plk1          | Plp2          | Plscr1        | Pmaip1        |
| Pold1         | Ppfibp1       | Ppmlk         | Ppplr13b      |
| Prcl          | Prkc1         | Prr13         | Psat1         |
| Ptpn3         | Ptpns         | Qpct          | Racgap1       |
| Rad51ap1      | Rapgef4       | Rbbp8         | Repin1        |
| Rfc3          | Rfc4          | Rfc5          | Rnaseh2b      |
| Rnf167        | Rpa2          | Rrm1          | Rrm2          |
| Rsad2         | Rtn4rl1       | Scml4         | Scpep1        |
| Sell          | Setd4         | Sfmbt2        | Sgol2         |
| Shc1          | Slc16a5       | Slc35a5       | Slfn5         |
| Smad5         | Snx14         | Spag5         | Spc24         |
| Spc25         | St14          | Stmn1         | Stx11         |
| Syce2         | Synpo         | T25670        | Tacc3         |
| Tcf19         | Tcrb-J        | Tgfbr2        | Tjp2          |
| Tk1           | Tmbim1        | Tmem2         | Tmem38b       |
| Tnfrsf4       | Top2a         | Tpi1          | Tpx2          |
| Trim34        | Trip13        | Tspan31       | Ttc28         |
| Tyms          | Ube2c         | Ube2t         | Uhrf1         |
| Usp18         | Whsc1         | Xrcc3         | Zbtb32        |
| Zfp652        | Zfp82         | Zmym2         | Znrf2         |
| aTreg/Rest    | 1110001A07Rik | 1110067D22Rik | 1500005A01Rik |
| 1500005K14Rik | 1500010J02Rik | 1700019D03Rik | 1700029F09Rik |
| 1810029B16Rik | 1810054D07Rik | 1810055G02Rik | 2010003J03Rik |
| 2010012C16Rik | 2010111I01Rik | 2210010C17Rik | 2310007D09Rik |
| 2310051E17Rik | 2310058N22Rik | 2310066E14Rik | 2610019F03Rik |

|               |               |               |               |
|---------------|---------------|---------------|---------------|
| 2610528E23Rik | 2700038C09Rik | 2810002D19Rik | 2900026A02Rik |
| 2900086B20Rik | 3200002M19Rik | 4632428N05Rik | 4921524J06Rik |
| 4930422G04Rik | 4930431B09Rik | 4930523C07Rik | 4930534B04Rik |
| 4930579G24Rik | 4932441K18Rik | 5730593F17Rik | 5830443L24Rik |
| 6330500D04Rik | 6720463M24Rik | 9130221H12Rik | 9130404D14Rik |
| 9230105E10Rik | 9430025N12Rik | A430107D22Rik | A930005H10Rik |
| Aaas          | Abca1         | Abcb1b        | Abi2          |
| Acpl2         | Acss1         | Actn1         | Acvr2a        |
| Agpat3        | AI413194      | AI450540      | AI451617      |
| AI504432      | AI847670      | AK122525      | Aldh7a1       |
| Alg10b        | Alg8          | Als2c1        | Als2cr4       |
| Ampd3         | Angpt12       | Ankrd13d      | App           |
| Arhgap4       | Atad2         | Atad5         | Atf7ip        |
| Atp10d        | AW011738      | Axin2         | B230339M05Rik |
| B230342M21Rik | B630005N14Rik | Bax           | BC004022      |
| BC006779      | BC013672      | BC050254      | Bcl11a        |
| Bcl11b        | Bmpr2         | Brca2         | Bri3          |
| Btg2          | C230085N15Rik | Cad           | Card11        |
| Ccdc50        | Ccne1         | Ccnt2         | Cdc34         |
| Cdc451        | Cdca2         | Cenpi         | Cep27         |
| Cept1         | Chchd6        | Chst2         | Cklf          |
| Cldnd1        | Cndp2         | Coll5a1       | Cpm           |
| Crtap         | Ctse          | Ctsw          | Cyb561d1      |
| Cyfip2        | Cyp2s1        | D12Ertd551e   | D12Ertd553e   |
| D17H6S56E-5   | D2Ertd435e    | D2hgdh        | D8Ertd82e     |
| D9Ertd402e    | Dapl1         | Dbf4          | Dennd2d       |
| Dguok         | Diap3         | Dkc1          | Dnahc8        |
| Dnajc2        | Dnajc3a       | Dopey2        | Dsn1          |
| Dsp           | Dtymk         | Dut           | Dyrk2         |
| Dzip1         | E130012A19Rik | E130016E03Rik | E2f1          |
| Eeal          | Egr2          | Ehd4          | Eif2a         |
| Emb           | Ercc61        | Ergic1        | Eroll         |
| Ets2          | Evi2b         | Evl           | Exo1          |
| Ezh1          | Faah          | Fbxo45        | Fbxo5         |
| Fbxo9         | Fen1          | Foxp3         | Fubp3         |
| Furin         | Gabarapl1     | Galk1         | Gas2l3        |
| Gba2          | Gcat          | Gemin8        | Gimap3        |
| Gimap6        | Gins2         | Gla           | Gmfb          |
| Gnaq          | Gpr68         | Gramd1a       | Grk6          |
| Gspt1         | Gyk           | H2-Ke6        | H2-Ob         |
| Hipk2         | Hist1h3a      | Hist2h2be     | Hist2h3c1     |
| Hmg20a        | Hmmr          | Hsh2d         | Icam2         |
| Id3           | Idh1          | Ifit1         | Ifnar1        |
| Igfbp7        | Igh-6         | Ikbke         | Ikzf4         |
| Il16          | Il17ra        | Il1rl2        | Il21r         |
| Il2rb         | Impa2         | Inpp1         | Irak4         |
| Itga4         | Itpr2         | Josd3         | Jun           |
| Kcnq5         | Kdelc1        | Kif11         | Kif1b         |
| Kif2c         | Klhdc1        | Lamp2         | Lap3          |
| Limd2         | Lipa          | Lman1         | LOC328483     |
| LOC623121     | Lrrc41        | Ltb           | Ly6c1         |
| Maml2         | Map2k3        | Mapkapk3      | Marveld1      |
| Mast3         | Mbnl3         | Mcm2          | Mcm4          |
| Mcm5          | Mcm7          | Mdfic         | Med14         |



|           |         |            |          |
|-----------|---------|------------|----------|
| Mef2d     | Memol   | Mlstd2     | Mphosph1 |
| Mppe1     | Mrel1a  | Mrps6      | Ms4a6b   |
| Mtbp      | Mtmr3   | Mx1        | NA       |
| Ncbp2     | Nedd1   | Nedd9      | Npc2     |
| Nr4a2     | Nsbp1   | Nsl1       | Nudt1    |
| Nudt5     | Nup155  | Nup205     | Nup50    |
| Oasl2     | Odc1    | Pa2g4      | Pabpc4   |
| Palb2     | Parp12  | Parp6      | Parp8    |
| Pask      | Pbxip1  | Pde2a      | Pde4b    |
| Pdk3      | Pdlim4  | Pdzd11     | Pea15a   |
| Pfn2      | Pgam1   | Phf1       | Phgdh    |
| Pik3r5    | Plec1   | Plekhg2    | Plk4     |
| Pold1     | Pold3   | Polr3k     | Ppa1     |
| Ppapdc1   | Ppil5   | Ppp1r7     | Prkca    |
| Prkd2     | Prnp    | Prr11      | Prr14    |
| Psat1     | Pscdbp  | Psmc3ip    | Pspc1    |
| Pstpip1   | Ptpla   | Ptpre      | Rabac1   |
| Rabgap11  | Ralgps2 | Ranbp1     | Rapgef2  |
| Rassf2    | Rbl1    | Rbpj       | Rdbp     |
| Recq14    | Reep3   | Rere       | Rfc3     |
| Rfxank    | Rgs16   | Rhobtb2    | Rhoq     |
| Rnf144    | Rnf213  | Rpa3       | Rps271   |
| Rrm1      | Rrm2    | Rtn3       | Rtp4     |
| Samd91    | Sap30   | Satb1      | Scg5     |
| Sell      | Serf1   | Sertad3    | Sfrs2    |
| Sh2d2a    | Shmt1   | Sidt1      | Sit1     |
| Siva1     | Skp2    | Sla        | Slc12a2  |
| Slc12a6   | Slc16a1 | Slc25a13   | Slc28a2  |
| Slc31a1   | Slc4a7  | Slmo2      | Smad4    |
| Smarcad1  | Smc2    | Smpd2      | Smpd4    |
| Snhg6     | Snrpd1  | Sp100      | Sp4      |
| Spry1     | Srrp    | St6galnac4 | Stab1    |
| Stard4    | Stk4    | Suv39h1    | Suv420h1 |
| Syncrip   | Syt12   | Tcrb-J     | Tcrb-V13 |
| Tcrb-V8.2 | Tcstv3  | Tfdp2      | Timp2    |
| Tle3      | Tmem134 | Tmem142b   | Tmem149  |
| Tmem158   | Tmem48  | Tmem8      | Tmem9b   |
| Tmie      | Tmpo    | Tnfrsf9    | Top2a    |
| Topbp1    | Traip   | Trem12     | Trim21   |
| Trim25    | Trim30  | Tspyl4     | Ttc28    |
| Ttk       | Ttyh3   | Twsg1      | Ube11    |
| Ube2h     | Uck2    | Uhrf1      | Ung      |
| Utrn      | Uxs1    | Vcl        | Vps13d   |
| Vps37b    | Wdr67   | Wdr90      | Whsc1    |
| Wipf1     | Zbtb4   | Zdhhc15    | Zdhhc18  |
| Zfp148    | Znfx1   | Znrf2      | Zyg11b   |

**Act/aT<sub>R</sub> + Act/Rest + aT<sub>R</sub>/Rest**

|               |         |       |          |
|---------------|---------|-------|----------|
| Abcel         | Ablim1  | Abtb2 | Acsl3    |
| Acvr1         | Adamts6 | Add3  | Alcam    |
| Arl4c         | Armex4  | Asns  | AW112010 |
| BC030867      | Bcat1   | Brcal | Bub1     |
| C330027C09Rik | C79407  | Capg  | Cbx5     |
| Ccdc50        | Ccdc99  | Ccl5  | Ccne2    |

|         |               |               |           |
|---------|---------------|---------------|-----------|
| Cd83    | Cdca5         | Cdkn1a        | Cenph     |
| Cenpk   | Cenpp         | Chek1         | Cpd       |
| Ctnna1  | Ctso          | Cyfip1        | D6Wsu176e |
| Ddx58   | Dhfr          | Dhodh         | Dna21     |
| Dtl     | Dusp4         | E030037K03Rik | E2f3      |
| E2f7    | EG666231      | Emp1          | Eomes     |
| Esco2   | F730047E07Rik | Fanca         | Fas       |
| Fcgr2b  | Foxm1         | Gimap6        | Gins1     |
| H2-Oa   | Hells         | Hist1h2bp     | Hnrp11    |
| Hsd11b1 | Hsd11         | Icos          | Ifitm3    |
| Il2ra   | Isgf3g        | Jak1          | Kcnk6     |
| Kif18a  | Klf10         | Lancl2        | Lipa      |
| Litaf   | LOC677168     | Lrrc41        | Lrrc41    |
| Mcm10   | Mcm3          | Mcm4          | Mcm6      |
| Mcm7    | Mettl7a       | Mmd           | Ms4a6d    |
| NA      | Ncf4          | Ncoa7         | Nipa2     |
| Nrp1    | Nudt4         | Oasl9         | Orc11     |
| Orc61   | Oxct1         | Pdap1         | Peci      |
| Pglyrp1 | Plagl2        | Plk4          | Pola1     |
| Pole    | Ppil5         | Prdm1         | Prim1     |
| Prim2   | Psrc1         | Ptcd3         | Ptprj     |
| Qser1   | Rab19         | Rad51         | Rad51ap1  |
| Rala    | Rasgrp1       | Rbpj          | Rcc1      |
| Rfc4    | Rgs1          | Rnf43         | S100a4    |
| S100a6  | Scpep1        | Sema7a        | Sgol1     |
| Siah1b  | Skp2          | Slbp          | Slc43a3   |
| Slfn8   | Smyd2         | Snhg3         | Socs2     |
| Ss18    | Ssh2          | St8sia6       | Stil      |
| Stk17b  | Tcf7          | Tcp1112       | Tfdp1     |
| Tipin   | Tjp2          | Tmcc3         | Tmem107   |
| Tmem63a | Trip13        | Tspan32       | Ttc27     |
| Utp20   | Weel          | Wipi2         | Zmym2     |
| Zwilch  |               |               |           |

Supplemental data 2.

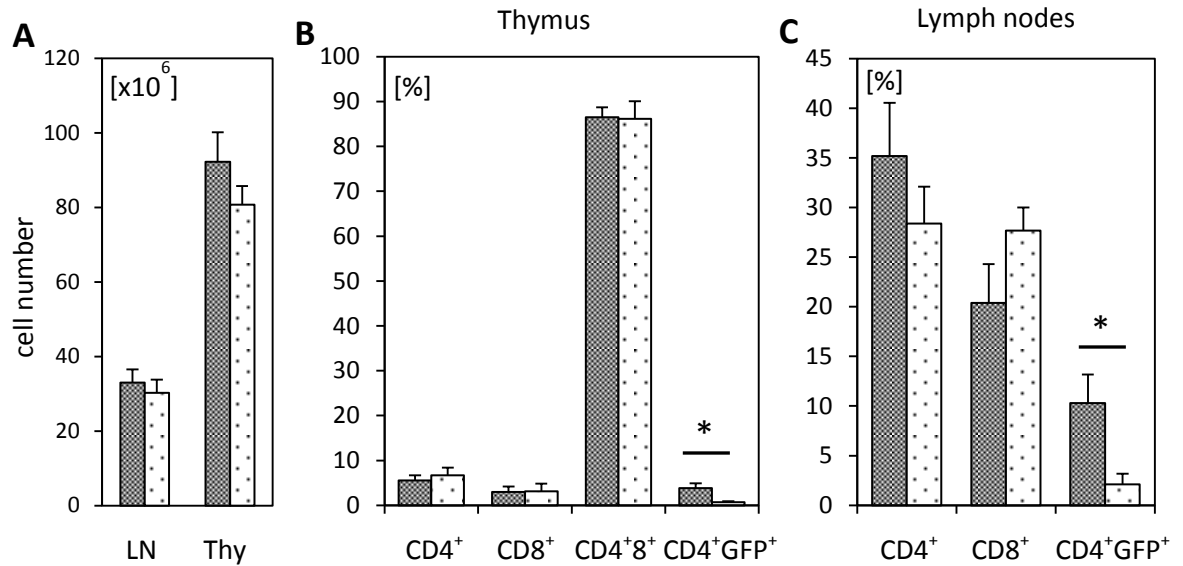

(A) Cell numbers recovered from lymph nodes (LN) and thymi (Thy) isolated from BMPR1 $\alpha^{Twt}$  (hatched bars) or BMPR1 $\alpha^{T-}$  (dotted bars) mice. Differences in the number of recovered cells between WT and KO mice are not statistically significant (lymph nodes  $p=0.12$ , thymi  $p=0.055$ ). (B) Percentage of single positive (CD4 $^+$  and CD8 $^+$ ), double positive (CD4 $^+8^+$ ) thymocytes and T<sub>R</sub> in the CD4 $^+$  subset (CD4 $^+GFP^+$ ) in thymi isolated from BMPR1 $\alpha^{Twt}$  (hatched bars) or BMPR1 $\alpha^{T-}$  (dotted bars) mice. Only differences in the percentage of T<sub>R</sub> cells are significant and marked by an asterisk. The  $p$  values for CD4 $^+$ , CD8 $^+$ , CD4 $^+8^+$  and CD4 $^+GFP^+$  populations are respectively 0.23, 0.47, 0.46, 0.004. (C) Percentage of helper (CD4 $^+$ ), cytotoxic (CD8 $^+$ ) T cells and T<sub>R</sub> cells in the CD4 $^+$  subset in lymph nodes isolated from BMPR1 $\alpha^{Twt}$  (hatched bars) or BMPR1 $\alpha^{T-}$  (dotted bars) mice. Only differences in the percentage of T<sub>R</sub> cells are significant and marked by an asterisk. The  $p$  values for CD4 $^+$ , CD8 $^+$  and CD4 $^+GFP^+$  populations are respectively 0.18, 0.20, 0.0002. The bars in all plots represent standard deviations. Samples were compared using Student t test. At least four mice/group were compared.
